# Supplementary material for: Percutaneous and surgical tracheostomy in critically ill adult patients: a meta-analysis
Source: Springer Nature journal article supplement (doi:10.1186/s13054-014-0544-7), 2014-12-19

**Fig. 1 Forest plot of comparison PT vs. ST**

**Fig. 1 a) Outcome: Major intraprocedural bleeding**

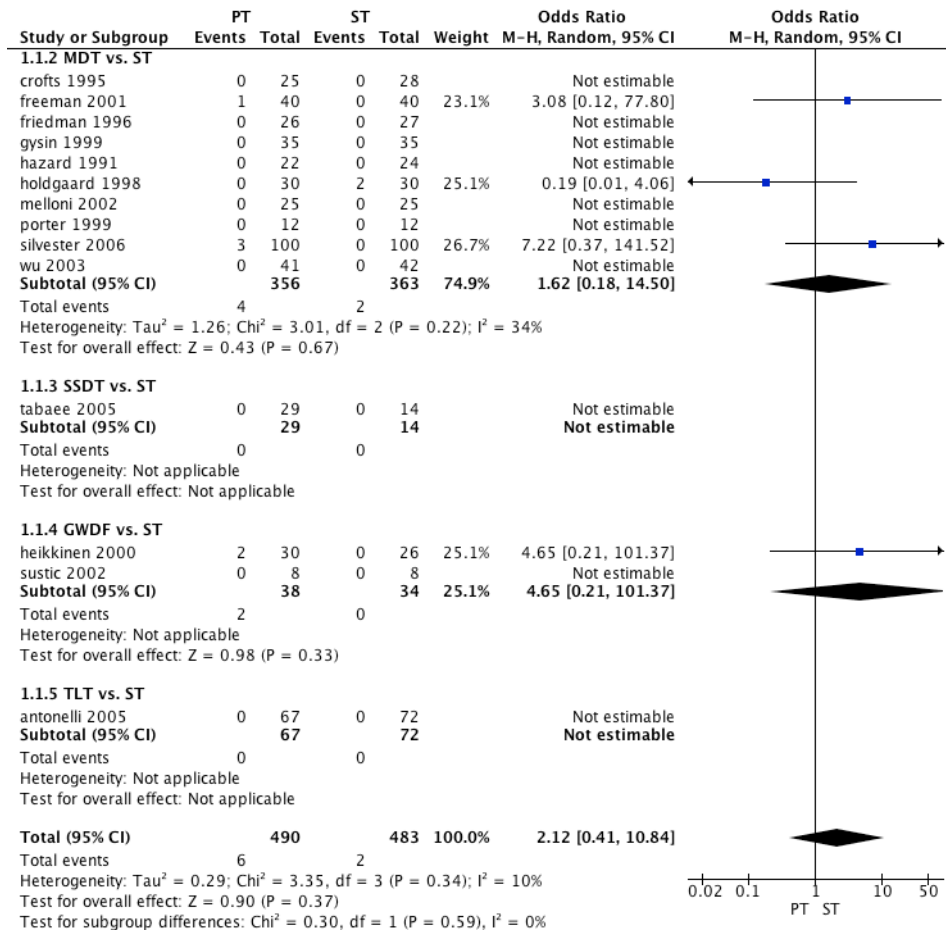

**Fig. 1 b) Outcome: Tracheal stenosis**

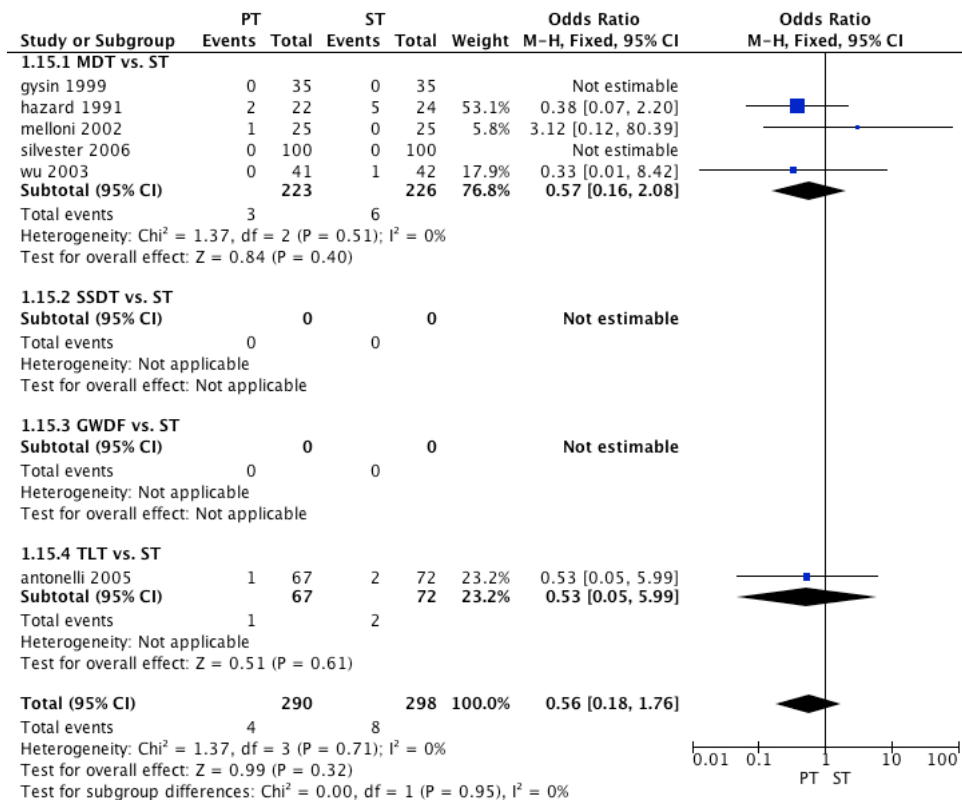

Fig. 1 c) Outcome: Hospital survival

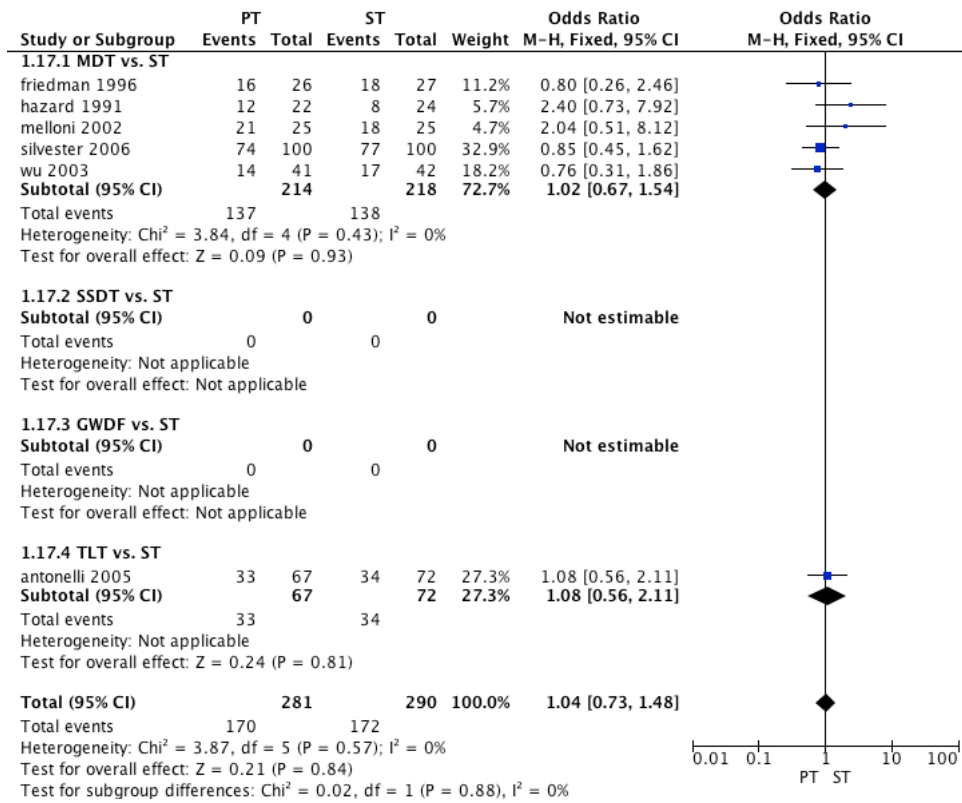

Fig. 1 d) Outcome: Duration of procedure

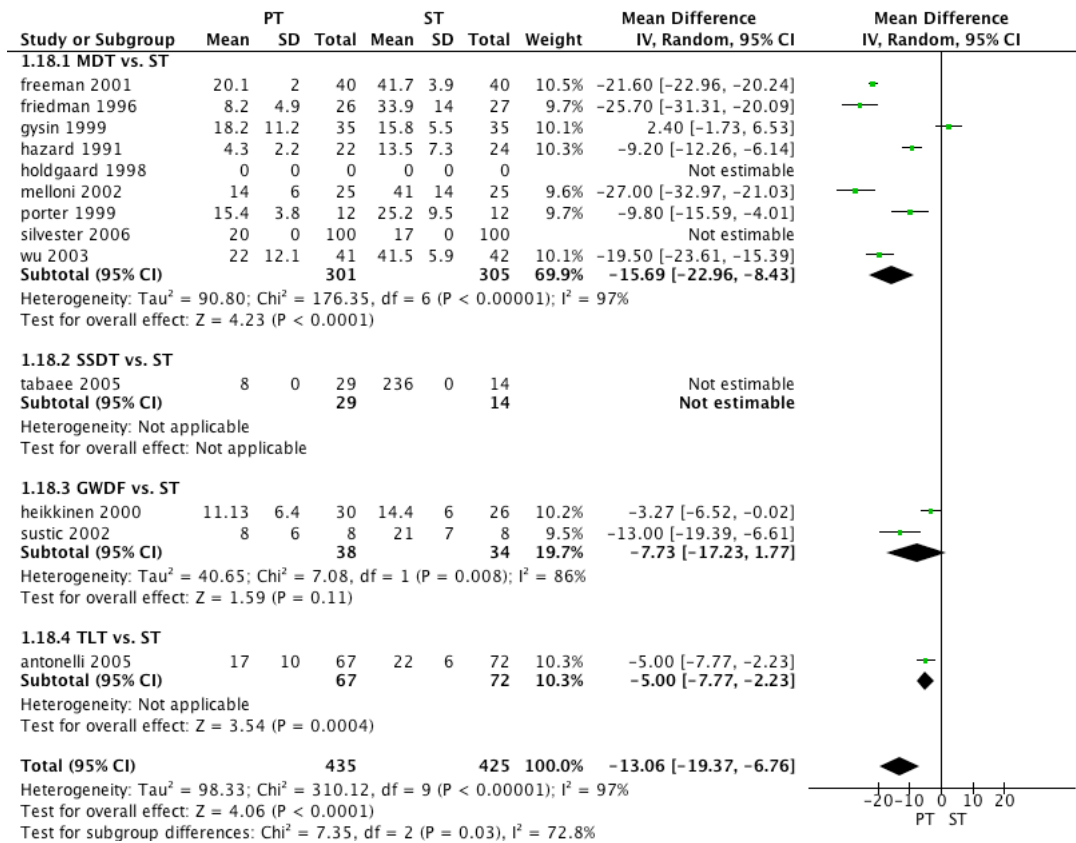

Fig 1 e) Outcome: Minor postprocedural bleeding

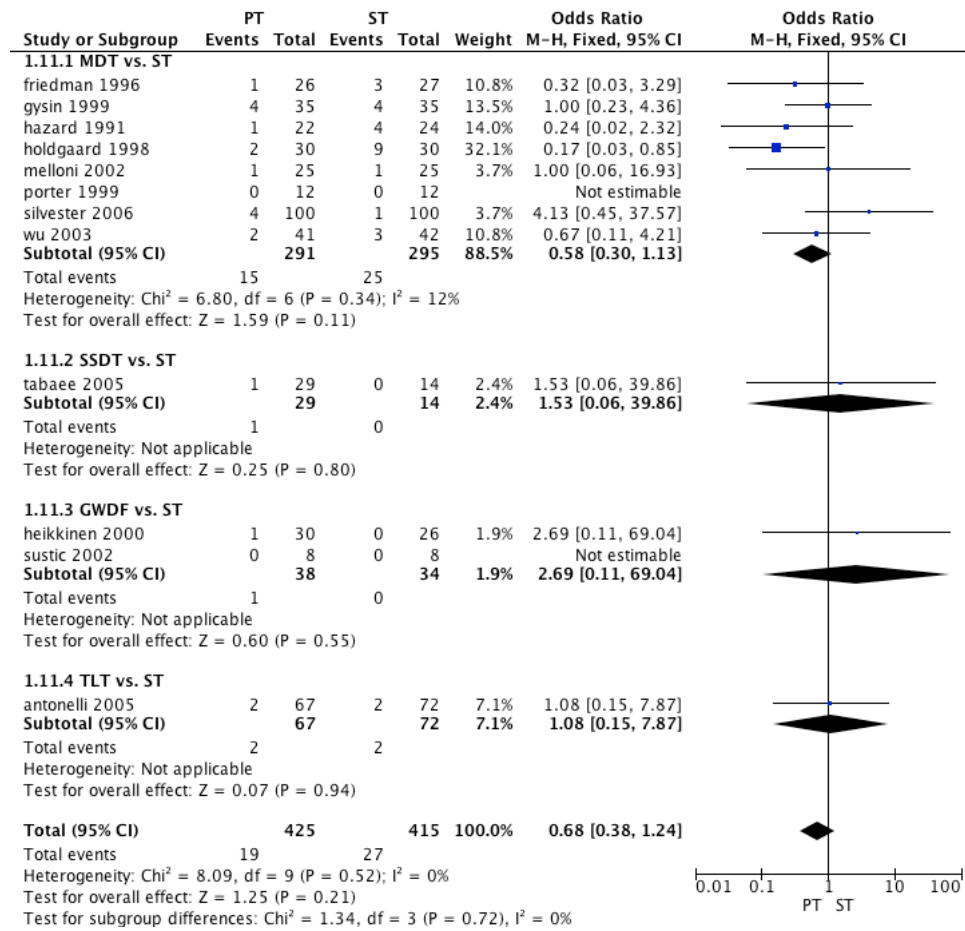

Fig. 1 f) Outcome: Minor intraprocedural bleeding

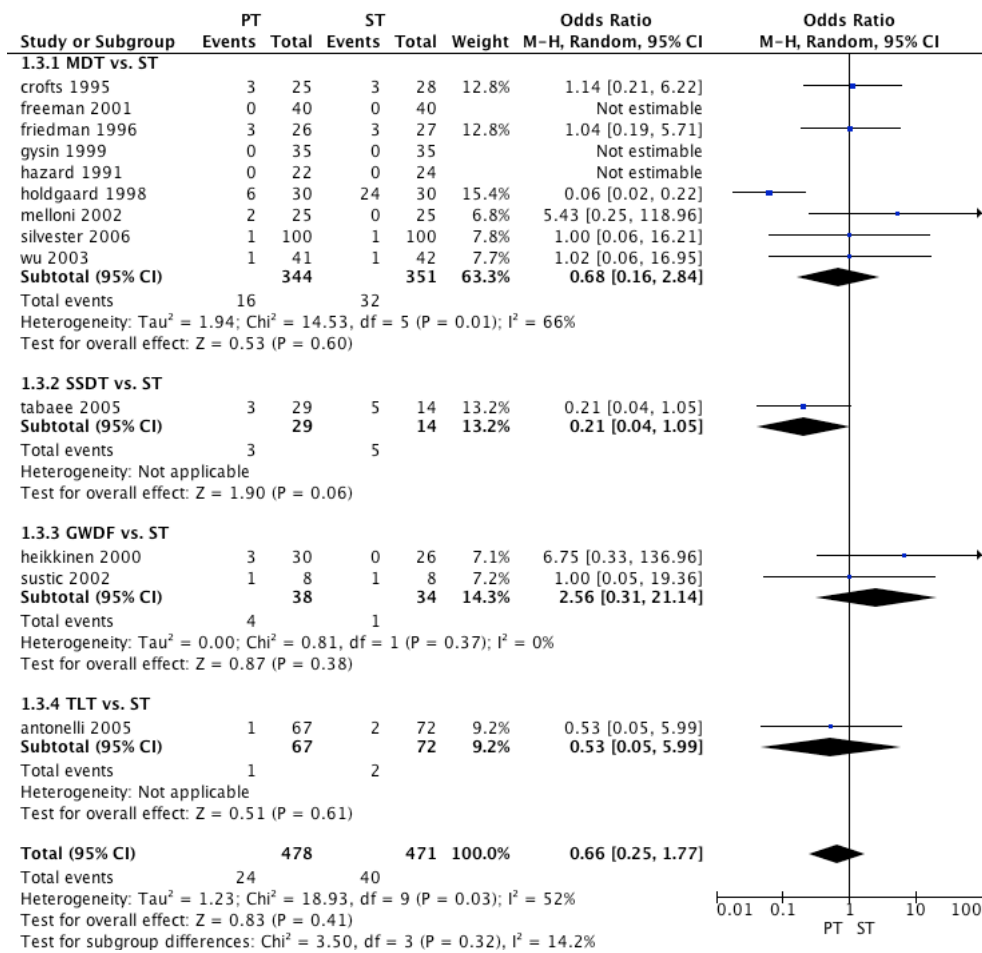

Fig. 1 g) Outcome: False route

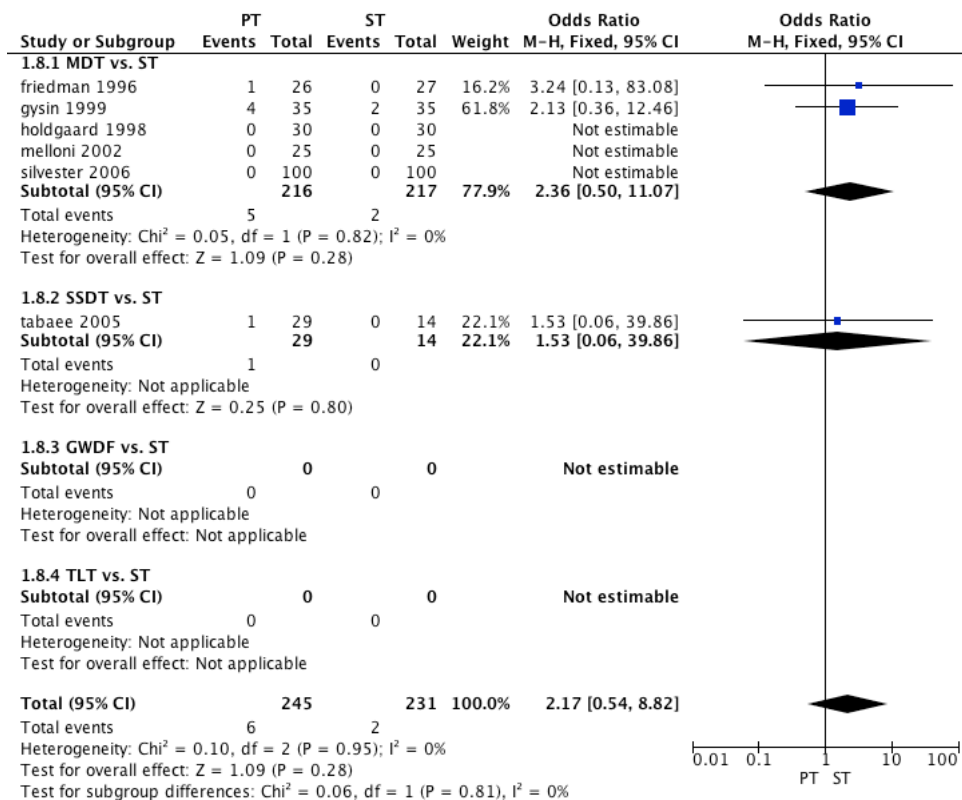

Fig. 1 h) Outcome: Subcutaneous emphysema

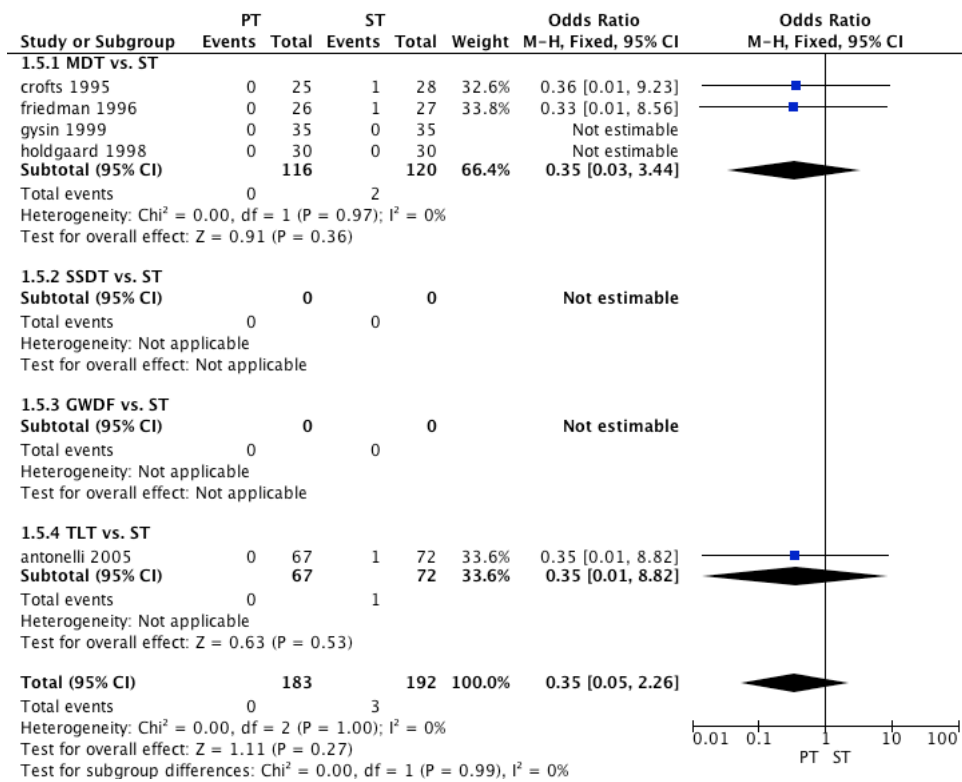

Fig. 1 i) Outcome: Pneumothorax

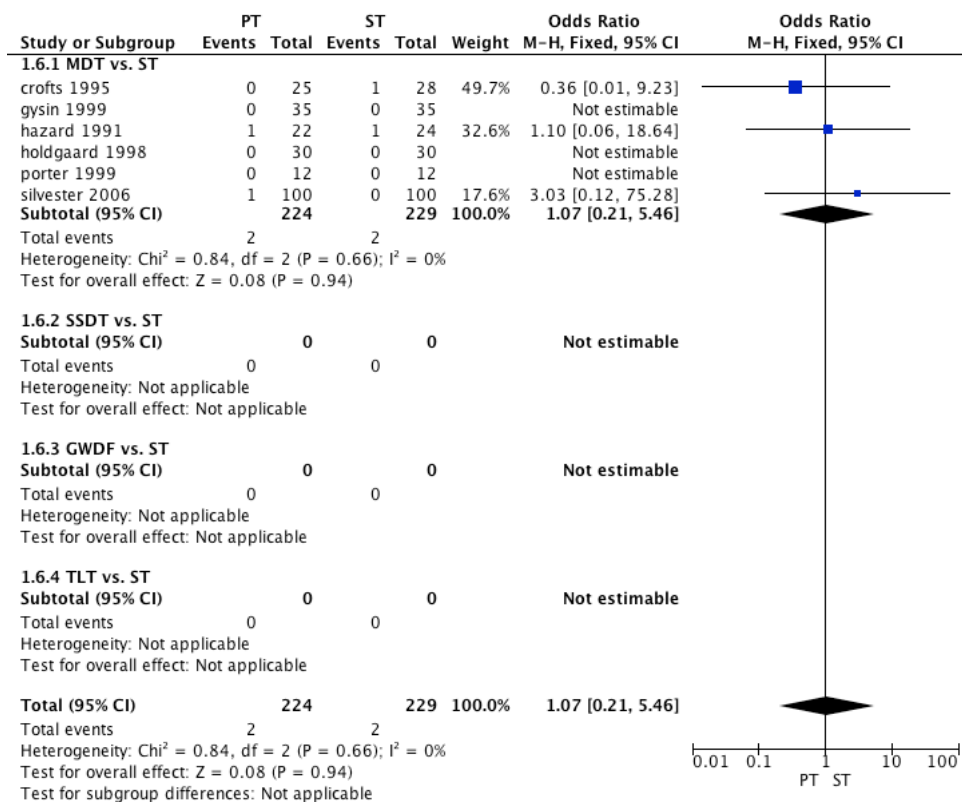

Fig. 1 j) Outcome: Desaturation

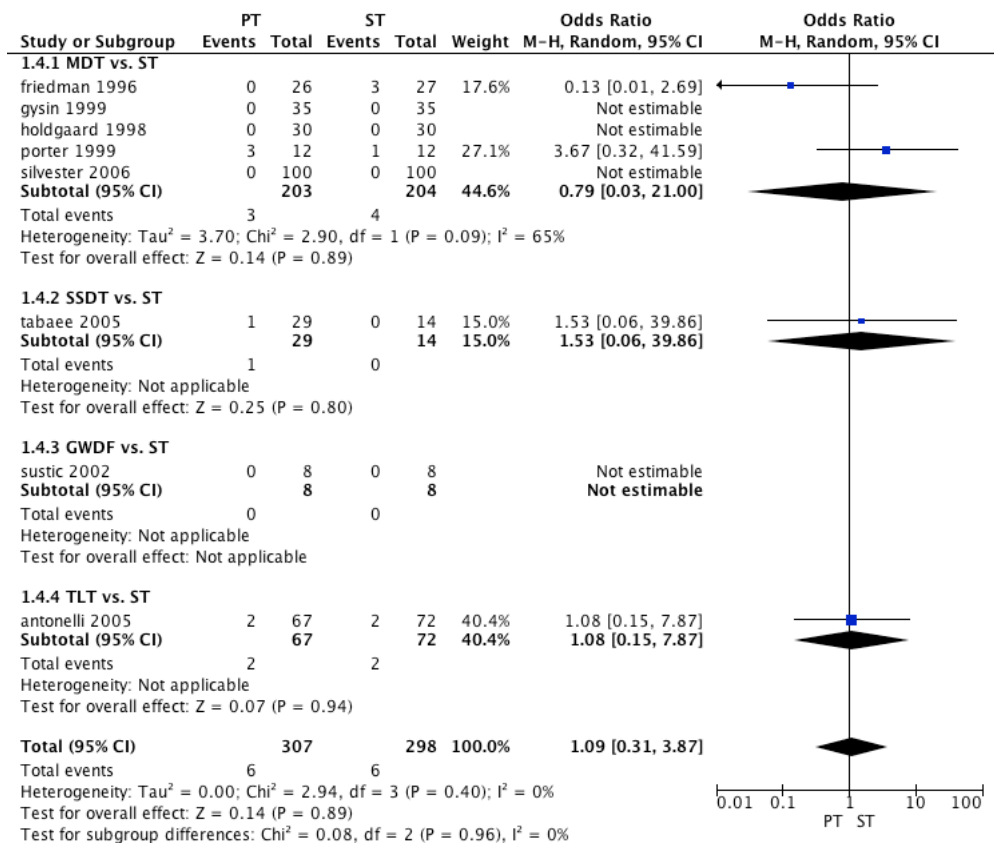

**Fig. 2 Forest plot of comparison MDT/ SSdT vs. RDT/ BDT/ GWDF**

**Fig. 2 a) Outcome: Major intraprocedural bleeding**

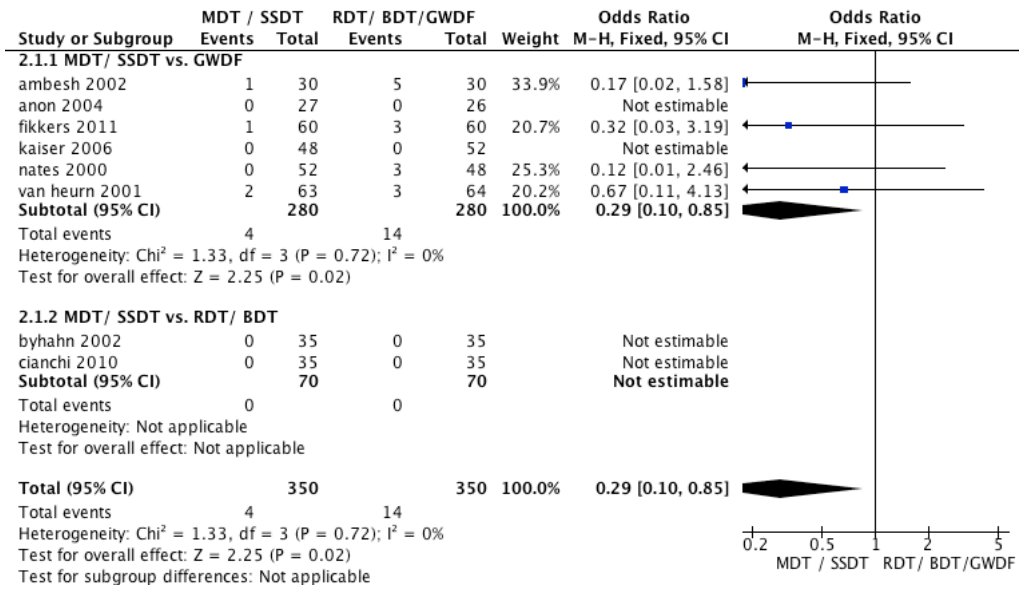

**Fig. 2 b) Outcome: Tracheal stenosis**

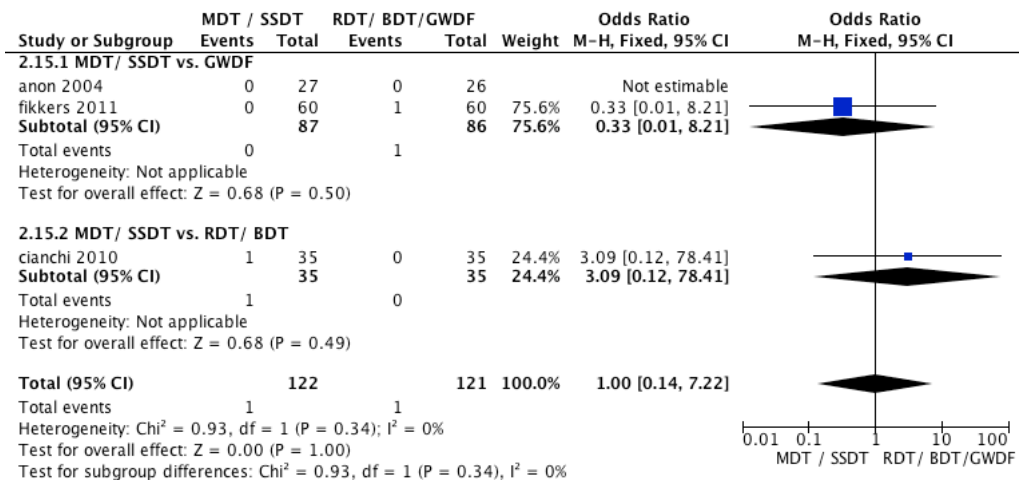

**Fig. 2 c) Outcome: Hospital survival**

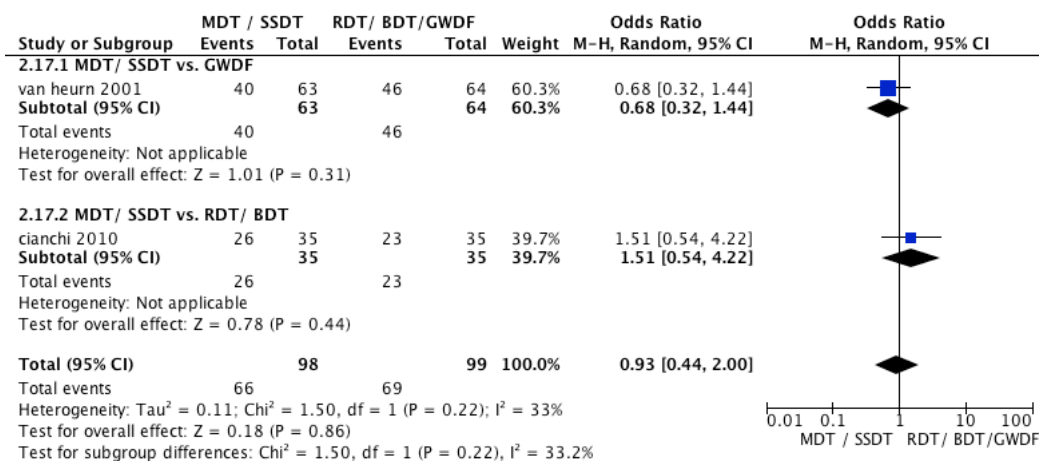



Fig. 2 d) Outcome: Duration of procedure

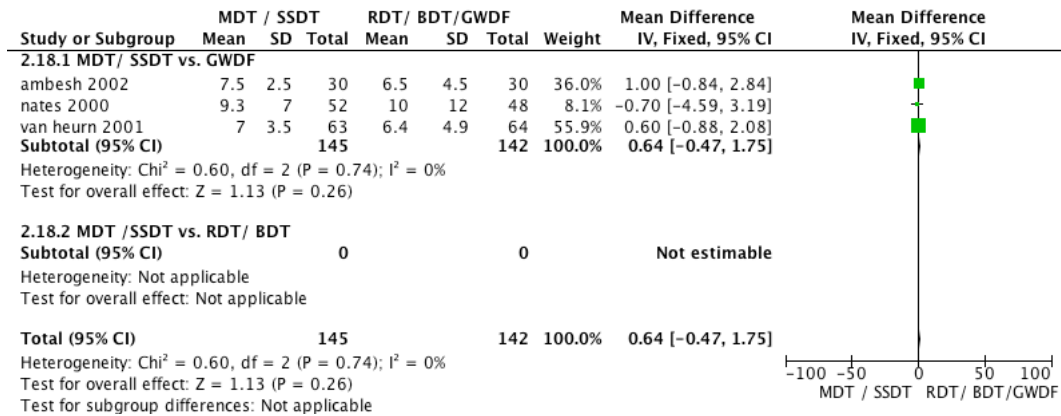

Fig 2 e) Outcome: Minor postprocedural bleeding

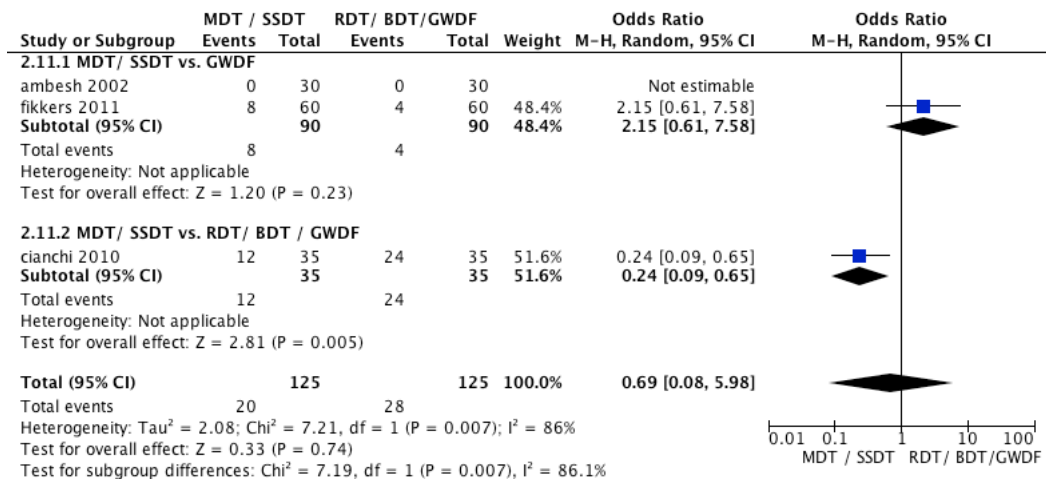

Fig. 2 f) Outcome: Minor intraprocedural bleeding

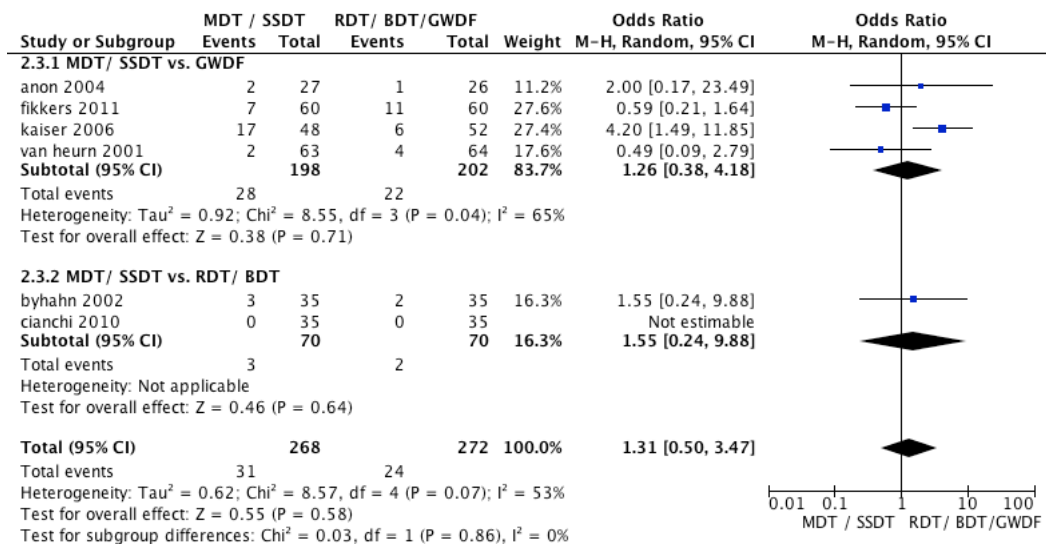



Fig. 2 g) Outcome: False route

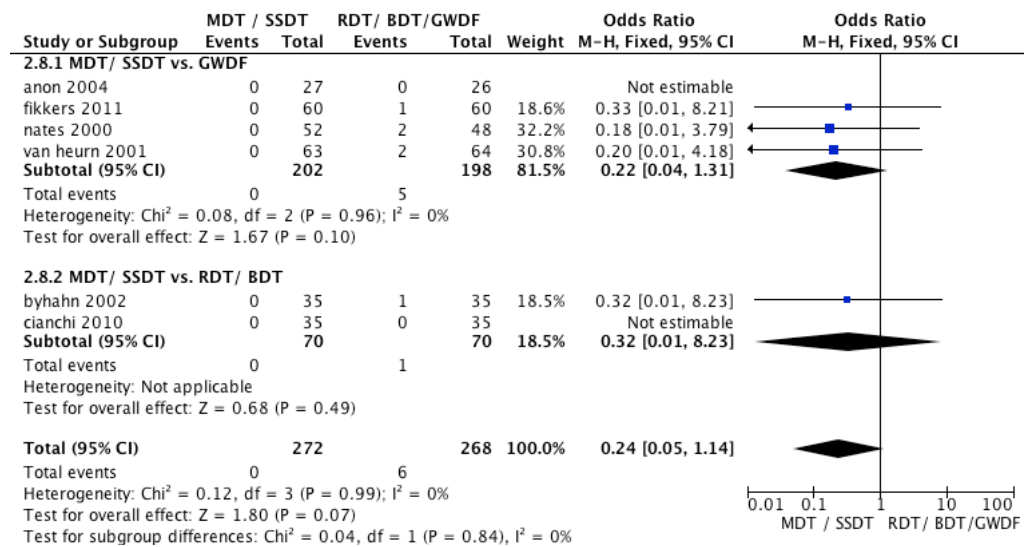

Fig. 2 h) Outcome: Subcutaneous emphysema

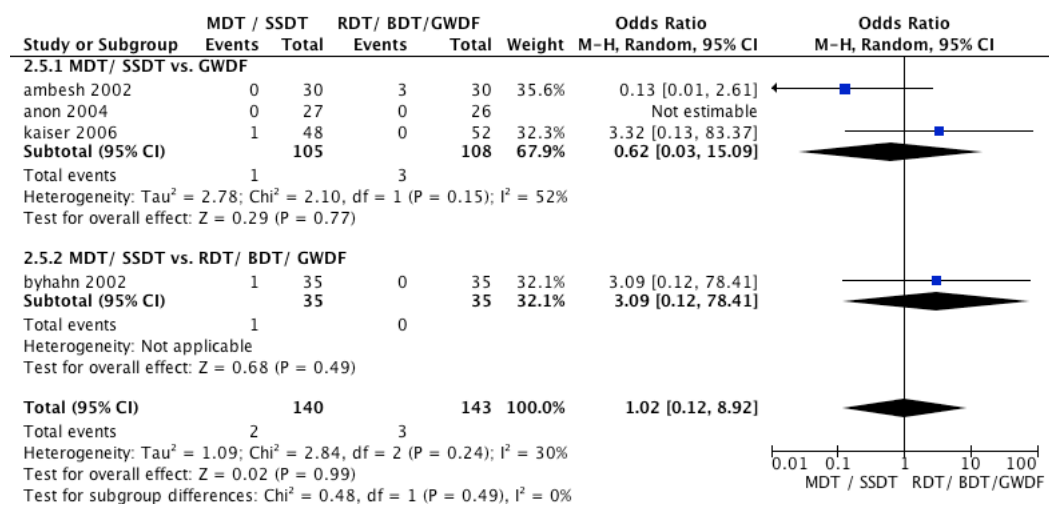

Fig. 2 i) Outcome: Pneumothorax

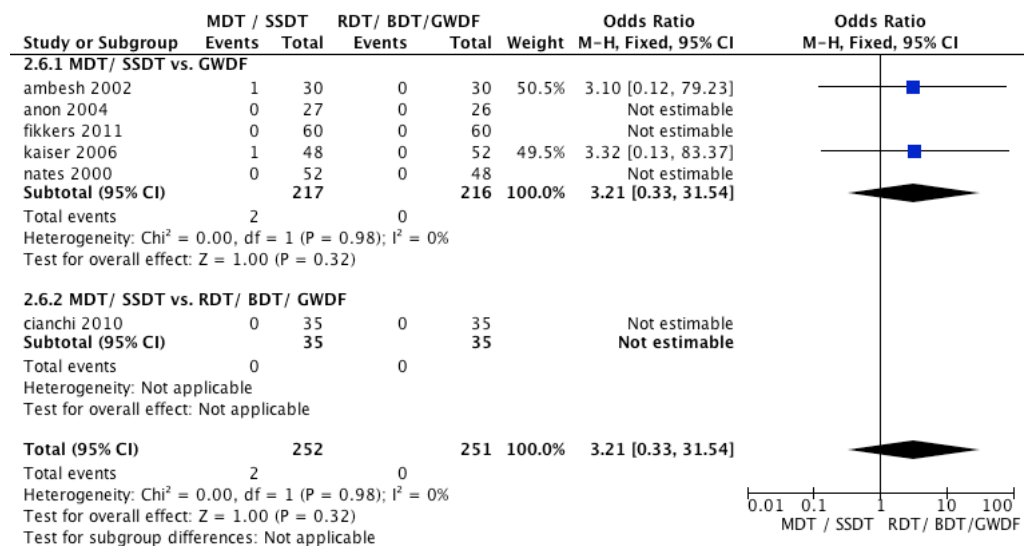

Fig. 2 j) Outcome: Desaturation

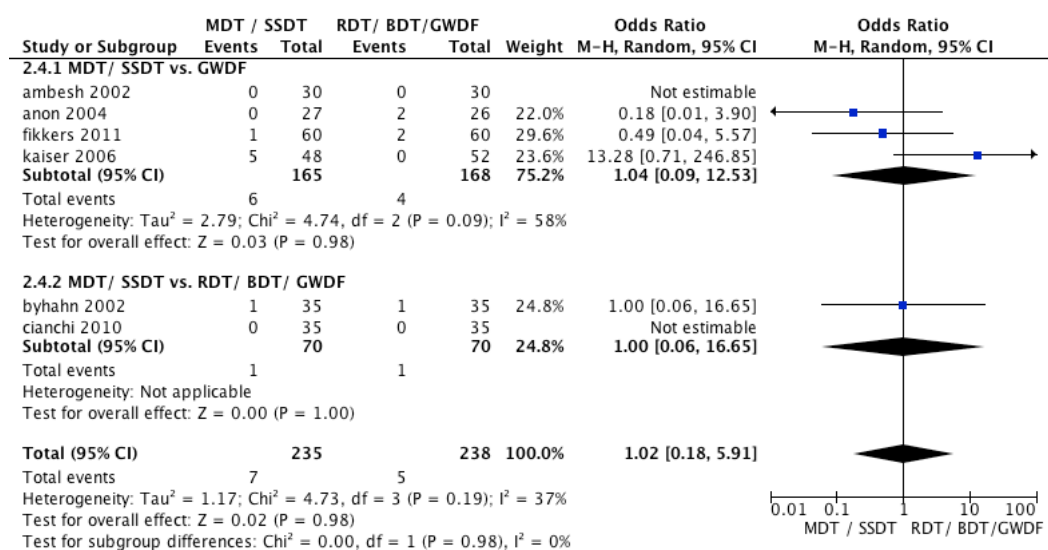

Supplement: MOESM3 [file 9779698]
