# Supplementary material for: Percutaneous and surgical tracheostomy in critically ill adult patients: a meta-analysis
Source: Springer Nature journal article supplement (doi:10.1186/s13054-014-0544-7), 2014-12-19
Supplement: MOESM2 [file 9779698]

Table S2.

## Characteristics of study population, exclusion criteria and outcomes

| study                           | patient population                                              | inter-<br>vention | com-<br>parison | exclusion criteria                                                                                                                                                                                                              | severity of<br>illness   | outcome/ complications                                                                                                                                                                                                                                                                    | performing medical<br>specialty | location of<br>procedure     | use of<br>bronchos-<br>copy | length of<br>procedure<br>(min)   |
|---------------------------------|-----------------------------------------------------------------|-------------------|-----------------|---------------------------------------------------------------------------------------------------------------------------------------------------------------------------------------------------------------------------------|--------------------------|-------------------------------------------------------------------------------------------------------------------------------------------------------------------------------------------------------------------------------------------------------------------------------------------|---------------------------------|------------------------------|-----------------------------|-----------------------------------|
| Wu<br>2003 <sup>45</sup>        | mixed general ICU<br>patients                                   | MDT               | ST              | previous neck surgery, difficult anatomy                                                                                                                                                                                        | NR                       | intraoperative bleeding, tube dislocation,<br>technical difficulties, difficult dilatation,<br>postoperative bleeding, stoma infection, length<br>of procedure, tracheal stenosis,<br>tracheomalacia, hospital mortality                                                                  | MDT: surgeon<br>ST: surgeon     | MDT: ICU<br>ST: OR           | no                          | 22 (12,1) vs.<br>41,5 (5,9)       |
| Freeman<br>2001 <sup>31</sup>   | mixed medical,<br>neurological, trauma<br>and surgical patients | MDT               | ST              | difficult anatomy, refractory coagulopathy,<br>difficult airway for translaryngeal intubation                                                                                                                                   | controlled:<br>APACHE II | intraoperative bleeding, tube dislocation,<br>technical difficulties, difficult dilatation,<br>postoperative bleeding, length of procedure,<br>LOS ICU, LOS hospital, ICU mortality, costs<br>of procedure                                                                                | NR                              | MDT: ICU<br>ST: OR           | yes, in<br>MDT              | 20,10 (2) vs.<br>41,7 (3,9)       |
| Hazard<br>1991 <sup>34</sup>    | mixed medical,<br>neurological, trauma<br>and surgical patients | MDT               | ST              | age < 15 yrs., potential extubation within 4 days,<br>uncorrectable hemostatic defects, anatomic<br>distortion of the trachea (by tumor, thyromegaly,<br>scarring by previous TT), infection of the soft<br>tissues of the neck | controlled:<br>SAPS II   | intraoperative bleeding, pneumothorax,<br>technical difficulties, difficult insertion,<br>postoperative bleeding, stoma infection,<br>tracheal stenosis, length of procedure, hospital<br>mortality                                                                                       | MDT: nr<br>ST: surgeon          | MDT: ICU<br>ST: ICU or<br>OR | no                          | 4,3 (2,2) vs.<br>13,5 (7,3)       |
| Crofts<br>1995 <sup>29</sup>    | mixed medical,<br>surgical and<br>neurosurgical patients        | MDT               | ST              | age < 16 yrs., enlarged thyroid gland, previous<br>TT, cervical spine fracture, coagulopathy                                                                                                                                    | controlled:<br>APACHE II | intraoperative bleeding, sc emphysema,<br>pneumothorax, technical difficulties, difficult<br>insertion, stoma infection, ICU mortality                                                                                                                                                    | MDT: ENT<br>ST: surgeon         | MDT: ICU<br>ST: OR           | no                          | NR                                |
| Friedman<br>1996 <sup>32</sup>  | mixed medical,<br>surgical and trauma<br>patients               | MDT               | ST              | clinical instability, PEEP >15 cmH <sub>2</sub> O,<br>uncorrectable coagulopathy, previous TT or neck<br>surgery, thyromegaly, anatomic distortion of<br>trachea, skin/ soft tissue infection at the TT site                    | controlled:<br>APACHE II | intraoperative bleeding, desaturation, sc<br>emphysema, false route, tube dislocation,<br>postoperative bleeding, tube dislocation,<br>stoma infection, length of procedure, hospital<br>mortality                                                                                        | MDT: intensivist<br>ST: surgeon | MDT: ICU<br>ST: OR           | no                          | 8,2 (4,9) vs.<br>33,9 (14)        |
| Porter<br>1999 <sup>40</sup>    | mixed medical and<br>surgical patients                          | MDT               | ST              | emergency TT, coagulopathy                                                                                                                                                                                                      | NR                       | intraoperative bleeding, desaturation,<br>pneumothorax, tube dislocation, technical<br>difficulties, difficult insertion, postoperative<br>bleeding, accidental decannulation, stoma<br>inflammation, stoma infection, length of<br>procedure                                             | MDT: surgeon<br>ST: surgeon     | MDT: ICU<br>ST: ICU or<br>OR | yes, in<br>MDT              | 15,4 (3,8) vs.<br>25,2 (9,5)      |
| Gysin<br>1999 <sup>33</sup>     | NR                                                              | MDT               | ST              | previous TT, tracheal pathology                                                                                                                                                                                                 | NR                       | intraoperative bleeding, desaturation, sc<br>emphysema, pneumothorax, false route,<br>technical difficulties, difficult dilatation,<br>difficult insertion, postoperative bleeding,<br>accidental decannulation, stoma infection,<br>tracheal stenosis, pneumonia, length of<br>procedure | MDT: ENT<br>ST: ENT             | MDT: ICU<br>ST: ICU or<br>OR | yes, in<br>MDT              | 18,2 (11,2)<br>vs. 15,8 (5,5)     |
| Silvester<br>2006 <sup>41</sup> | mixed medical,<br>neurological, trauma<br>and surgical patients | MDT               | ST              | coagulopathy, anatomical abnormality of the<br>anterior neck (trachea, thyroid, vessels),<br>previous TT, cervical spine injury                                                                                                 | controlled:<br>APACHE II | intraoperative bleeding, desaturation,<br>hypercarbia, pneumothorax, false route, tube<br>dislocation, technical difficulties, postoperative<br>bleeding, stoma inflammation, stoma infection,<br>tracheal stenosis, length of procedure, ICU<br>mortality, hospital mortality            | MDT: intensivist<br>ST: surgeon | MDT: ICU<br>ST: ICU          | yes, in<br>MDT              | 20 (nr) vs. 17<br>(nr)            |
| Holdgaard<br>1998 <sup>36</sup> | mixed medical,<br>neurological and<br>surgical patients         | MDT               | ST              | age < 18 yrs., previous TT, pathology of the<br>neck, neck deformities, unidentifiable anatomy of<br>the neck, pts. with radiotherapy                                                                                           | NR                       | intraoperative bleeding, desaturation, sc<br>emphysema, pneumothorax, false route,<br>technical difficulties, difficult insertion,<br>postoperative bleeding, stoma inflammation,<br>stoma infection, length of procedure, LOS<br>hospital                                                | MDT: nr<br>ST: surgeon          | MDT: OR<br>ST: OR            | no                          | median 11,5<br>vs. median<br>15,5 |

|                                 |                                                                 |      |      |                                                                                                                                                                                                                                                                     |                          |                                                                                                                                                                                                                                                                                  |                                        |                              |                            |                             |
|---------------------------------|-----------------------------------------------------------------|------|------|---------------------------------------------------------------------------------------------------------------------------------------------------------------------------------------------------------------------------------------------------------------------|--------------------------|----------------------------------------------------------------------------------------------------------------------------------------------------------------------------------------------------------------------------------------------------------------------------------|----------------------------------------|------------------------------|----------------------------|-----------------------------|
| Melloni<br>2002 <sup>38</sup>   | mixed medical,<br>trauma and<br>neurological patients           | MDT  | ST   | age <15 yrs., intubation >100, thyromegaly,<br>history of laryngeal and tracheal disease,<br>previous TT or neck, laryngeal and tracheal<br>surgery                                                                                                                 | controlled:<br>SAPS      | intraoperative bleeding, false route, , technical<br>difficulties, difficult insertion, postoperative<br>bleeding, accidental decannulation, stoma<br>infection, tracheal stenosis, length of<br>procedure, ICU mortality, hospital mortality                                    | MDT: intensivist<br>ST: surgeon        | MDT: ICU<br>ST: ICU or<br>OR | yes, in<br>MDT             | 14 (6) vs. 41<br>(14)       |
| Sustic<br>2002 <sup>42</sup>    | pts. after spinal cord<br>fusion for spinal cord<br>trauma      | GWDF | ST   | infection of the surgical scar, refractory<br>coagulopathy                                                                                                                                                                                                          | NR                       | intraoperative bleeding, desaturation,<br>hypercarbia, postoperative infection,<br>postoperative bleeding, stoma inflammation,<br>stoma infection, length of procedure, LOS ICU,<br>ICU mortality                                                                                | GWDF: intensivist<br>ST: surgeon       | GWDF: ICU<br>ST: OR          | no                         | 8 (6) vs.<br>21 (7)         |
| Antonelli<br>2005 <sup>26</sup> | mixed medical,<br>trauma and surgical<br>patients               | TLT  | ST   | emergency TT, age <18 yrs, severe<br>coagulopathy, surgical wounds near the TT site,<br>previous TT, difficult anatomy, inability to extend<br>the neck, significant thyroid gland enlargement,<br>palpable neck vessels                                            | controlled:<br>SAPS II   | intraoperative bleeding, desaturation, sc<br>emphysema, tube dislocation, postoperative<br>bleeding, stoma inflammation, stoma infection,<br>tracheomalacia, tracheal stenosis, pneumonia,<br>LOS ICU, length of procedure, ICU mortality,<br>hospital mortality                 | TLT: intensivist<br>ST: ENT            | TLT: ICU<br>ST: OR           | no                         | 17 (10) vs.<br>22 (6)       |
| Tabae<br>2005 <sup>43</sup>     | medical and<br>neurological patients                            | SSDT | ST   | NR                                                                                                                                                                                                                                                                  | NR                       | intraoperative bleeding, desaturation, false<br>route, tube dislocation, technical difficulties,<br>difficult dilatation, difficult insertion,<br>postoperative bleeding, length of procedure                                                                                    | MDT: intensivist/<br>ST: ENT           | MDT: ICU<br>ST: ICU          | yes, in<br>MDT             | 8 (nr) vs.<br>23,6 (nr)     |
| Heikkinen<br>2000 <sup>35</sup> | surgical patients                                               | GWDF | ST   | previous TT or neck surgery, thyromegaly,<br>infection at the TT site, extreme obesity                                                                                                                                                                              | NR                       | intraoperative bleeding, technical difficulties,<br>difficult insertion, postoperative bleeding,<br>stoma infection, length of procedure                                                                                                                                         | GWDF:surgeon<br>ST: surgeon            | GWDF:ICU<br>ST: ICU          | no                         | 11,13 (6,4)<br>vs. 14,4 (6) |
| Byhahn<br>2002 <sup>27</sup>    | mixed medical,<br>neurological and<br>surgical patients         | SSDT | RDT  | infection of the TT site, difficult endotracheal<br>intubation, difficult anatomy, instable cervical<br>spine, age <18 yrs.                                                                                                                                         | NR                       | intraoperative bleeding, desaturation, sc<br>emphysema, false route, tube dislocation,<br>technical difficulties, difficult dilatation, difficult<br>insertion, postoperative bleeding, accidental<br>decannulation, staom inflammation, stoma<br>infection, length of procedure | SSDT: intensivist<br>RDT: intensivist  | SSDT:ICU<br>RDT: ICU         | yes, in<br>SSDT and<br>RDT | NR                          |
| Cianchi<br>2010 <sup>28</sup>   | mixed medical and<br>trauma patients                            | SSDT | BDT  | infection, injury or malignancies of the anterior<br>neck, severe headinjury, with CPP <60 mmHg<br>despite therapy, thyromegaly, coagulation<br>disorders                                                                                                           | NR                       | intraoperative bleeding, desaturation,<br>pneumothorax, false route, difficult insertion,<br>postoperative bleeding, tracheal stenosis, LOS<br>ICU, LOS hospital, length of procedure, ICU<br>mortality, hospital mortality                                                      | SSDT: intensivist<br>BDT: intensivist  | SSDT: ICU<br>BDT: ICU        | yes, in<br>SSDT and<br>BDT | median 1,5<br>vs. median 4  |
| van Heurn<br>2001 <sup>44</sup> | NR                                                              | MDT  | GWDF | PEEP >10cmH <sub>2</sub> O, FiO <sub>2</sub> >0.8, uncorrectable<br>coagulopathy, infection of the soft tissues of the<br>neck, fracture of the cervical spine                                                                                                      | NR                       | intraoperative bleeding, false route, technical<br>difficulties, difficult insertion, LOS ICU, hospital<br>mortality                                                                                                                                                             | MDT: surgeon<br>GWDF: surgeon          | MDT: ICU<br>GWDF: ICU        | no                         | 7 (3,5) vs.<br>6,4 (4,9)    |
| Ambesh<br>2002 <sup>24</sup>    | NR                                                              | SSDT | GWDF | NR                                                                                                                                                                                                                                                                  | controlled:<br>APACHE II | intraoperative bleeding, desaturation,<br>hypercarbia, sc emphysema, pneumothorax,<br>technical difficulties, difficult insertion,<br>postoperative bleeding, tube dislocation,<br>stoma infection, length of procedure                                                          | SSDT: intensivist<br>GWDF: intensivist | SSDT: ICU<br>GWDF: ICU       | yes                        | 7,5 (2,5) vs.<br>6,5 (4,5)  |
| Nates<br>2000 <sup>39</sup>     | mixed trauma and<br>general ICU patients                        | MDT  | GWDF | infection of the anterior neck, uncontrolled<br>coagulopathy, age <15 yrs., anatomical<br>abnormalities (enlarged thyroid gland or vascular<br>abnormalities), airway emergencies, previous<br>neck surgery or trauma, pregnancy, burns,<br>poststernotomy          | controlled:<br>APACHE II | intraoperative bleeding, pneumothorax, false<br>route, technical difficulties, postoperative<br>bleeding, stoma infection, length of procedure,<br>ICU mortality                                                                                                                 | MDT: intensivist<br>GWDF: intensivist  | MDT: ICU<br>GWDF: ICU        | no                         | 9,3 (7) vs. 10<br>(12)      |
| Anon<br>2004 <sup>25</sup>      | mixed medical,<br>neurological, trauma<br>and surgical patients | SSDT | GWDF | PEEP >10cmH <sub>2</sub> O, FiO <sub>2</sub> >0.8, uncorrectable<br>coagulopathy, infection of the soft tissues of the<br>neck, fracture of the cervical spine, anatomical<br>distortion of the trachea, previous neck surgery,<br>goiter, infection of the TT site | controlled:<br>APACHE II | intraoperative bleeding, desaturation, sc<br>emphysema, pneumothorax, false route,<br>technical difficulties, difficult insertion, stoma<br>infection, tracheal stenosis, length of<br>procedure, ICU mortality                                                                  | SSDT: intensivist<br>GWDF: intensivist | SSDT: ICU<br>GWDF: ICU       | no                         | median 9 vs.<br>median 7    |

|                               |                                                                 |      |      |                                                                                                                                                                                                                                                              |                        |                                                                                                                                                                                                                                                                        |                                        |                        |                             |                           |
|-------------------------------|-----------------------------------------------------------------|------|------|--------------------------------------------------------------------------------------------------------------------------------------------------------------------------------------------------------------------------------------------------------------|------------------------|------------------------------------------------------------------------------------------------------------------------------------------------------------------------------------------------------------------------------------------------------------------------|----------------------------------------|------------------------|-----------------------------|---------------------------|
| Kaiser<br>2006 <sup>37</sup>  | mixed medical,<br>neurological, trauma<br>and surgical patients | MDT  | GWDF | undentifiable anatomy of the neck, short neck,<br>cervical spine stiffness or trauma, coagulation<br>disorders                                                                                                                                               | controlled:<br>SAPS II | intraoperative bleeding, desaturation, SC<br>emphysema, pneumothorax, tube dislocation,<br>technical difficulties, length of procedure                                                                                                                                 | MDT: intensivist<br>GWDF: intensivist  | MDT: ICU<br>GWDF: ICU  | yes, in<br>MDT and<br>GWDF  | median 7 vs.<br>median 4  |
| Fikkers<br>2011 <sup>30</sup> | NR                                                              | SSDT | GWDF | goiter, no palpable landmarks, distance cricoid to<br>manubrium <3 cm at maximum extension,<br>infection at the TT site, severe uncorrectable<br>coagulopathy, PEEP >10 cmH <sub>2</sub> O, ICP >20 cm<br>H <sub>2</sub> O, age <18 yrs., body weight <40 kg | controlled:<br>SOFA    | intraoperative bleeding, desaturation,<br>pneumothorax, false route, technical<br>difficulties, difficult dilatation, difficult insertion,<br>postoperative bleeding, accidental<br>decannulation, stoma infection, tracheal<br>stenosis, LOS ICU, length of procedure | SSDT: intensivist<br>GWDF: intensivist | SSDT: ICU<br>GWDF: ICU | yes, in<br>SSDT and<br>GWDF | median 8 vs.<br>median 10 |

TT = tracheotomy; ST = surgical tracheotomy; PT = percutaneous tracheotomy; MDT = multiple dilatation tracheotomy (Ciaglia); SSDT = single step dilatation tracheotomy (blue rhino); TLT = translaryngeal tracheotomy (Fantoni); RDT = rotational dilatation tracheotomy (percutwist); BDT = balloon dilatation tracheotomy (blue dolphin); GWDF = guide wire dilatation forceps (Griggs); APACHE = acute physiology and chronic health evaluation score; SAPS = simplified acute physiology score; SOFA = sequential organ failure assessment score; BMI = body mass index; NR = not reported; d = day/s; mo = months; wk/s = week/s; ICU = intensive care unit; ENT = ear, nose and throat (specialist); OR = operation room, LOS = length of stay; PEEP = positive endexpiratory pressure; FiO<sub>2</sub> = fraction of inspired oxygen; ICP = intracranial pressure; CPP = cerebral perfusion pressure
